# Supplementary material
Source: Royal Society of Chemistry journal article supplement (doi:10.1039/d6en00099a)
Supplement: d6en00099a1.pdf [file d6en00099a1.pdf]

## Supporting Information

### **Rational Design of a Dummy-Imprinted Nanoplatfom for Ultrasensitive and Leakage-Free Headspace-Electrochemical Detection of 2-MIB**

Zeyang Li<sup>1</sup>, Anuja Tripathi<sup>1</sup>, Yuan Tian<sup>2</sup>, Jingsi Gao<sup>2</sup>, Jianfeng Zhou<sup>2\*</sup>, Xing Xie<sup>1\*</sup>

<sup>1</sup> School of Civil and Environmental Engineering, Georgia Institute of Technology,  
Atlanta, Georgia 30332, United States

<sup>2</sup> School of Material and Environmental Engineering, Shenzhen Polytechnic  
University, Shenzhen 518055, China

\*Corresponding Author

Email: zhoujianfeng@szpu.edu.cn; xing.xie@ce.gatech.edu

Submission: January 31, 2026

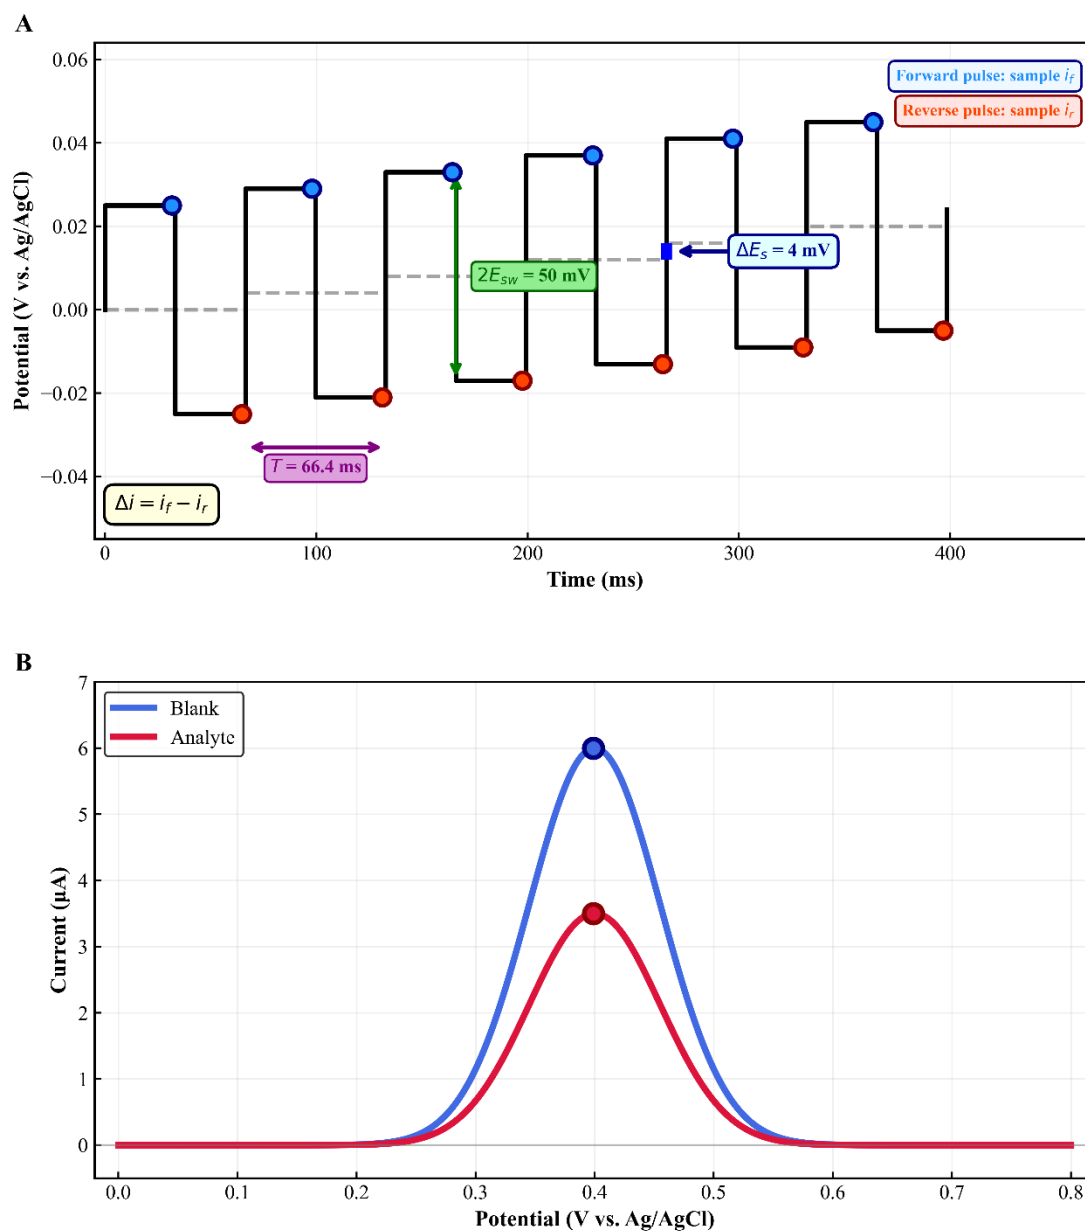

Fig. S1. Schematic Illustration of the Square Wave Voltammetry (SWV) Mechanism and Signal Quantification Strategy.

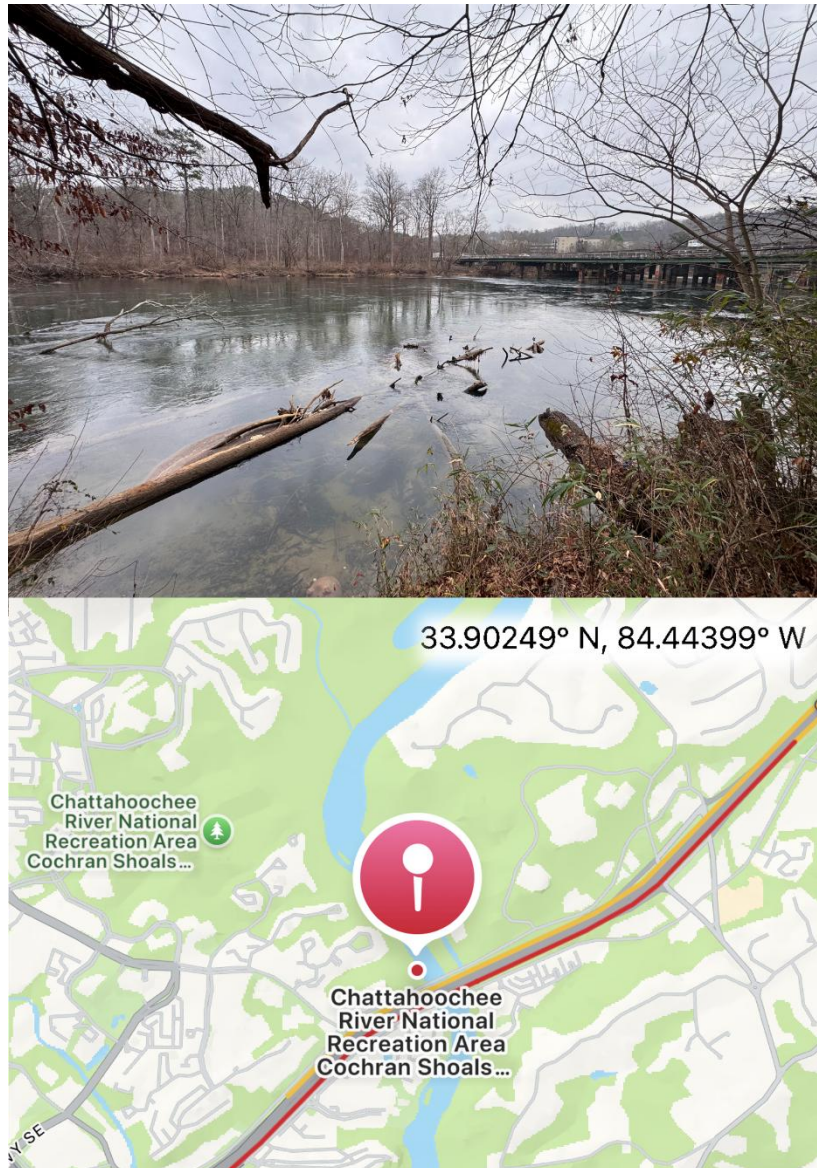

*Fig. S2. On-Site Sampling Location and Environmental Context of the Chattahoochee River (Georgia, USA).*

*Table S1. Physicochemical characteristics of the different water matrices used for environmental validation*

| <b>Sample Type</b>                | <b>Source</b>           | <b>pH</b> | <b>Conductivity<br/>(<math>\mu\text{S}/\text{cm}</math>)</b> |
|-----------------------------------|-------------------------|-----------|--------------------------------------------------------------|
| <b>Bottled Spring Water (BSW)</b> | Local Supermarket       | 7.54      | 7.156                                                        |
| <b>River Water (RW)</b>           | Chattahoochee River, GA | 8.21      | 2524                                                         |

Table S2. Full Screening Ranked by Topological Torsion Similarity to 2-MIB

| CID      | Name                                                                                          | SMILES                                        | Candidate | Topological Torsion | Rank |
|----------|-----------------------------------------------------------------------------------------------|-----------------------------------------------|-----------|---------------------|------|
| 16913    | 1,2,7,7-tetramethylbicyclo[2.2.1]heptan-2-ol                                                  | <chem>CC1(C2CCC1(C(C2)(C)O)C)C</chem>         | FALSE     | 1                   | 1    |
| 11062802 | (1R,2R,4R)-1,2,7,7-tetramethylbicyclo[2.2.1]heptan-2-ol                                       | <chem>CC1(C2CCC1(C(C2)(C)O)C)C</chem>         | FALSE     | 1                   | 2    |
| 12648890 | 1,2,3,3-tetramethylbicyclo[2.2.1]heptan-2-ol                                                  | <chem>CC1(C2CCC(C2)(C1(C)O)C)C</chem>         | FALSE     | 0.6667              | 3    |
| 106997   | 2-Ethylfenchol                                                                                | <chem>CCC1(C(C2CCC1(C2)C)(C)C)O</chem>        | TRUE      | 0.587               | 4    |
| 76959240 | (1R,2R,4S)-2-ethyl-1,3,3-trimethylbicyclo[2.2.1]heptan-2-ol                                   | <chem>CCC1(C(C2CCC1(C2)C)(C)C)O</chem>        | FALSE     | 0.587               | 5    |
| 1753956  | (3R,6S,9S)-2,2,8,8-tetramethyloctahydro-1H-2,4a-methanonaphthalen-9-ol                        | <chem>CC1(CCCC2(C13CCC(C3)C2(C)C)O)C</chem>   | FALSE     | 0.5                 | 6    |
| 534931   | 2,2,8,8-tetramethyloctahydro-1H-2,4a-methanonaphthalen-9-ol                                   | <chem>CC1(CCCC2(C13CCC(C3)C2(C)C)O)C</chem>   | FALSE     | 0.5                 | 7    |
| 11043252 | (1'R,2S,4S,4'R)-1',7',7'-trimethyl-2-propan-2-ylspiro[1,3-dioxane-4,2'-bicyclo[2.2.1]heptane] | <chem>CC(C)C1OCCC2(O1)CC3CCC2(C3(C)C)C</chem> | FALSE     | 0.4828              | 8    |
| 107035   | 2,2,8,8-tetramethyl-6-oxatetracyclo[7.2.1.01,7.05,7]dodecane                                  | <chem>CC1(CCC2C3(C14CCC(C4)C3(C)C)O2)C</chem> | FALSE     | 0.403               | 9    |
| 10955174 | (1R,3R,6S,7S,8S)-2,2,6,8-tetramethyltricyclo[5.3.1.03,8]undecan-3-ol                          | <chem>CC1CCC2(C(C3CCC2(C1C3)C)(C)C)O</chem>   | FALSE     | 0.3934              | 10   |

|              |                                                                          |                                |       |        |    |
|--------------|--------------------------------------------------------------------------|--------------------------------|-------|--------|----|
| 521903       | 2,2,6,8-tetramethyltricyclo[5.3.1.0 <sup>3,8</sup> ]undecan-3-ol         | CC1CCC2(C(C3CCC2(C1C3)C)(C)C)O | FALSE | 0.3934 | 11 |
| 442384       | (6S,8S)-2,2,6,8-tetramethyltricyclo[5.3.1.0 <sup>3,8</sup> ]undecan-3-ol | CC1CCC2(C(C3CCC2(C1C3)C)(C)C)O | FALSE | 0.3934 | 12 |
| 122428<br>24 | (1R,4S)-1,7,7-trimethylbicyclo[2.2.1]heptan-2-ol                         | CC1(C2CCC1(C(C2)O)C)C          | FALSE | 0.3469 | 13 |
| 446301<br>07 | (2S,4R)-1,7,7-trimethylbicyclo[2.2.1]heptan-2-ol                         | CC1(C2CCC1(C(C2)O)C)C          | FALSE | 0.3469 | 14 |
| 186397<br>28 | (1S)-1,7,7-trimethylbicyclo[2.2.1]heptan-2-ol                            | CC1(C2CCC1(C(C2)O)C)C          | FALSE | 0.3469 | 15 |
| 697364<br>0  | (1S,2S,4S)-1,7,7-trimethylbicyclo[2.2.1]heptan-2-ol                      | CC1(C2CCC1(C(C2)O)C)C          | FALSE | 0.3469 | 16 |
| 439568       | (2S)-1,7,7-trimethylbicyclo[2.2.1]heptan-2-ol                            | CC1(C2CCC1(C(C2)O)C)C          | FALSE | 0.3469 | 17 |
| 512289       | (1R,2R)-1,7,7-trimethylbicyclo[2.2.1]heptan-2-ol                         | CC1(C2CCC1(C(C2)O)C)C          | FALSE | 0.3469 | 18 |
| 230920       | (1S,2S,4R)-1,7,7-trimethylbicyclo[2.2.1]heptan-2-ol                      | CC1(C2CCC1(C(C2)O)C)C          | FALSE | 0.3469 | 19 |
| 657014       | (1R,4R)-1,7,7-trimethylbicyclo[2.2.1]heptan-2-ol                         | CC1(C2CCC1(C(C2)O)C)C          | FALSE | 0.3469 | 20 |
| 632140<br>5  | (1R,2R,4R)-1,7,7-trimethylbicyclo[2.2.1]heptan-2-ol                      | CC1(C2CCC1(C(C2)O)C)C          | TRUE  | 0.3469 | 21 |
| 64685        | 1,7,7-trimethylbicyclo[2.2.1]heptan-2-ol                                 | CC1(C2CCC1(C(C2)O)C)C          | TRUE  | 0.3469 | 22 |

|              |                                                               |                           |       |        |    |
|--------------|---------------------------------------------------------------|---------------------------|-------|--------|----|
| 120151<br>8  | (1S,2R,4S)-1,7,7-trimethylbicyclo[2.2.1]heptan-2-ol           | CC1(C2CCC1(C(C2)O)C)C     | FALSE | 0.3469 | 23 |
| 655200<br>9  | (1R,2S,4R)-1,7,7-trimethylbicyclo[2.2.1]heptan-2-ol           | CC1(C2CCC1(C(C2)O)C)C     | FALSE | 0.3469 | 24 |
| 183458<br>91 | (1R)-1,7,7-trimethylbicyclo[2.2.1]heptan-2-ol                 | CC1(C2CCC1(C(C2)O)C)C     | FALSE | 0.3469 | 25 |
| 10049        | (1S,2R,4R)-1,7,7-trimethylbicyclo[2.2.1]heptan-2-ol           | CC1(C2CCC1(C(C2)O)C)C     | FALSE | 0.3469 | 26 |
| 685074<br>4  | (1S,4S)-1,7,7-trimethylbicyclo[2.2.1]heptan-2-ol              | CC1(C2CCC1(C(C2)O)C)C     | FALSE | 0.3469 | 27 |
| 439569       | (2R)-1,7,7-trimethylbicyclo[2.2.1]heptan-2-ol                 | CC1(C2CCC1(C(C2)O)C)C     | FALSE | 0.3469 | 28 |
| 95330        | 2-methoxy-1,7,7-trimethylbicyclo[2.2.1]heptane                | CC1(C2CCC1(C(C2)OC)C)C    | FALSE | 0.3333 | 29 |
| 518472       | (1,7,7-trimethyl-2-bicyclo[2.2.1]heptanyl) formate            | CC1(C2CCC1(C(C2)OC=O)C)C  | FALSE | 0.3269 | 30 |
| 236238<br>68 | [(1R,2R,4R)-1,7,7-trimethyl-2-bicyclo[2.2.1]heptanyl] formate | CC1(C2CCC1(C(C2)OC=O)C)C  | FALSE | 0.3269 | 31 |
| 222115<br>93 | [(1S,2R,4S)-1,7,7-trimethyl-2-bicyclo[2.2.1]heptanyl] formate | CC1(C2CCC1(C(C2)OC=O)C)C  | FALSE | 0.3269 | 32 |
| 134283<br>28 | [(1R,2S,4R)-1,7,7-trimethyl-2-bicyclo[2.2.1]heptanyl] formate | CC1(C2CCC1(C(C2)OC=O)C)C  | FALSE | 0.3269 | 33 |
| 6448         | (1,7,7-trimethyl-2-bicyclo[2.2.1]heptanyl) acetate            | CC(=O)OC1CC2CCC1(C2(C)C)C | FALSE | 0.3208 | 34 |
| 695027<br>3  | [(1S,2S,4S)-1,7,7-trimethyl-2-bicyclo[2.2.1]heptanyl] acetate | CC(=O)OC1CC2CCC1(C2(C)C)C | FALSE | 0.3208 | 35 |

|              |                                                                    |                             |       |        |    |
|--------------|--------------------------------------------------------------------|-----------------------------|-------|--------|----|
| 93009        | [(1S,2R,4S)-1,7,7-trimethyl-2-bicyclo[2.2.1]heptanyl] acetate      | CC(=O)OC1CC2CCC1(C2(C)C)C   | FALSE | 0.3208 | 36 |
| 442460       | [(2R)-1,7,7-trimethyl-2-bicyclo[2.2.1]heptanyl] acetate            | CC(=O)OC1CC2CCC1(C2(C)C)C   | FALSE | 0.3208 | 37 |
| 137503<br>67 | 2-[(1,7,7-trimethyl-2-bicyclo[2.2.1]heptanyl)oxy]ethanol           | CC1(C2CCC1(C(C2)OCCO)C)C    | FALSE | 0.3208 | 38 |
| 443131       | [(2S)-1,7,7-trimethyl-2-bicyclo[2.2.1]heptanyl] acetate            | CC(=O)OC1CC2CCC1(C2(C)C)C   | FALSE | 0.3208 | 39 |
| 637531       | [(1R,2R,4R)-1,7,7-trimethyl-2-bicyclo[2.2.1]heptanyl] acetate      | CC(=O)OC1CC2CCC1(C2(C)C)C   | FALSE | 0.3208 | 40 |
| 1.32E+<br>08 | [(1S,2R)-1,7,7-trimethyl-2-bicyclo[2.2.1]heptanyl] acetate         | CC(=O)OC1CC2CCC1(C2(C)C)C   | FALSE | 0.3208 | 41 |
| 695027<br>4  | [(1R,2S,4R)-1,7,7-trimethyl-2-bicyclo[2.2.1]heptanyl] acetate      | CC(=O)OC1CC2CCC1(C2(C)C)C   | FALSE | 0.3208 | 42 |
| 111255       | 2-[[1S,2S,4S)-1,7,7-trimethyl-2-bicyclo[2.2.1]heptanyl]oxy]ethanol | CC1(C2CCC1(C(C2)OCCO)C)C    | FALSE | 0.3208 | 43 |
| 236178<br>63 | [(1S,2S,4S)-1,7,7-trimethyl-2-bicyclo[2.2.1]heptanyl] propanoate   | CCC(=O)OC1CC2CCC1(C2(C)C)C  | FALSE | 0.3091 | 44 |
| 236178<br>64 | [(1R,2R,4R)-1,7,7-trimethyl-2-bicyclo[2.2.1]heptanyl] propanoate   | CCC(=O)OC1CC2CCC1(C2(C)C)C  | FALSE | 0.3091 | 45 |
| 89306        | (1,7,7-trimethyl-2-bicyclo[2.2.1]heptanyl) propanoate              | CCC(=O)OC1CC2CCC1(C2(C)C)C  | FALSE | 0.3091 | 46 |
| 769660<br>69 | [(1S,2R,4S)-1,7,7-trimethyl-2-bicyclo[2.2.1]heptanyl] butanoate    | CCCC(=O)OC1CC2CCC1(C2(C)C)C | FALSE | 0.3036 | 47 |
| 97897        | (1,7,7-trimethyl-2-bicyclo[2.2.1]heptanyl) butanoate               | CCCC(=O)OC1CC2CCC1(C2(C)C)C | FALSE | 0.3036 | 48 |

|              |                                                                          |                                             |       |        |    |
|--------------|--------------------------------------------------------------------------|---------------------------------------------|-------|--------|----|
| 531564<br>5  | 1,7-dimethyl-7-(4-methylpent-3-enyl)bicyclo[2.2.1]heptan-2-ol            | <chem>CC(=CCCC1(C2CCC1(C(C2)O)C)C)C</chem>  | FALSE | 0.3036 | 49 |
| 189552<br>45 | 2-methyl-3-[(1,7,7-trimethyl-2-bicyclo[2.2.1]heptanyl)oxy]propan-1-ol    | <chem>CC(CO)COC1CC2CCC1(C2(C)C)C</chem>     | FALSE | 0.3036 | 50 |
| 174490       | [(1R,2R,4R)-1,7,7-trimethyl-2-bicyclo[2.2.1]heptanyl] 2-methylpropanoate | <chem>CC(C)C(=O)OC1CC2CCC1(C2(C)C)C</chem>  | FALSE | 0.2982 | 51 |
| 60968        | (1,7,7-trimethyl-2-bicyclo[2.2.1]heptanyl) 3-methylbutanoate             | <chem>CC(C)CC(=O)OC1CC2CCC1(C2(C)C)C</chem> | FALSE | 0.2982 | 52 |
| 91226        | (1,7,7-trimethyl-2-bicyclo[2.2.1]heptanyl) 2-methylpropanoate            | <chem>CC(C)C(=O)OC1CC2CCC1(C2(C)C)C</chem>  | FALSE | 0.2982 | 53 |
| 366904<br>86 | [(1S,2S,4S)-1,7,7-trimethyl-2-bicyclo[2.2.1]heptanyl] 3-methylbutanoate  | <chem>CC(C)CC(=O)OC1CC2CCC1(C2(C)C)C</chem> | FALSE | 0.2982 | 54 |
| 769571<br>21 | [(1R,2R,4R)-1,7,7-trimethyl-2-bicyclo[2.2.1]heptanyl] 3-methylbutanoate  | <chem>CC(C)CC(=O)OC1CC2CCC1(C2(C)C)C</chem> | FALSE | 0.2982 | 55 |
| 236236<br>51 | [(1S,2R,4S)-1,7,7-trimethyl-2-bicyclo[2.2.1]heptanyl] 3-methylbutanoate  | <chem>CC(C)CC(=O)OC1CC2CCC1(C2(C)C)C</chem> | FALSE | 0.2982 | 56 |
| 220821<br>79 | (1,7,7-trimethyl-2-bicyclo[2.2.1]heptanyl) 2-methylbutanoate             | <chem>CCC(C)C(=O)OC1CC2CCC1(C2(C)C)C</chem> | FALSE | 0.2881 | 57 |

|              |                                                                                                                                     |                                                        |       |        |    |
|--------------|-------------------------------------------------------------------------------------------------------------------------------------|--------------------------------------------------------|-------|--------|----|
| 610072       | 1,5,5,8-tetramethyltricyclo[5.4.0.04,8]undecan-7-ol                                                                                 | <chem>CC1(CC2(C3(CCCC2(C1CC3)C)C)O)C</chem>            | FALSE | 0.2879 | 58 |
| 308286<br>1  | (1R,4S,7R,8S)-1,5,5,8-tetramethyltricyclo[5.4.0.04,8]undecan-7-ol                                                                   | <chem>CC1(CC2(C3(CCCC2(C1CC3)C)C)O)C</chem>            | FALSE | 0.2879 | 59 |
| 133454       | (2aS,4aR,8R)-2,2,4a,8-tetramethyl-2a,3,4,5,6,7-hexahydro-1H-cyclobuta[i]inden-8-ol                                                  | <chem>CC1(CC23C1CCC2(CCCC3(C)O)C)C</chem>              | FALSE | 0.2879 | 60 |
| 106674       | 4-(1,7,7-trimethyl-2-bicyclo[2.2.1]heptanyl)cyclohexan-1-ol                                                                         | <chem>CC1(C2CCC1(C(C2)C3CCC(CC3)O)C)C</chem>           | FALSE | 0.2698 | 61 |
| 160707<br>53 | 1-(1,7,7-trimethyl-2-bicyclo[2.2.1]heptanyl)cyclohexan-1-ol                                                                         | <chem>CC1(C2CCC1(C(C2)C3(CCCC3)O)C)C</chem>            | FALSE | 0.2615 | 62 |
| 163417       | 1,5,8-trimethylbicyclo[3.2.1]octan-8-ol                                                                                             | <chem>CC12CCCC(C1(C)O)(CC2)C</chem>                    | FALSE | 0.2593 | 63 |
| 242493       | (3R,5S,8R,9S,10S,13S,14S,17S)-10,13,17-trimethyl-1,2,3,4,5,6,7,8,9,11,12,14,15,16-tetradecahydrocyclopenta[a]phenanthrene-3,17-diol | <chem>CC12CCC(CC1CCC3C2CCC4(C3CCC4(C)O)C)O</chem>      | FALSE | 0.2436 | 64 |
| 101819       | (3S,5S,8R,9S,10S,13S,14S,17S)-10,13,17-trimethyl-1,2,3,4,5,6,7,8,9,11,12,14,15,16-tetradecahydrocyclopenta[a]phenanthrene-3,17-diol | <chem>CC12CCC(CC1CCC3C2CCC4(C3CCC4(C)O)C)O</chem>      | FALSE | 0.2436 | 65 |
| 157060<br>76 | (3R,5R,7R,8R,9S,10S,13S,14S,17S)-7,10,13,17-tetramethyl-                                                                            | <chem>CC1CC2CC(CCC2(C3C1C4CCC(C4(CC3)C)(C)O)C)O</chem> | FALSE | 0.2346 | 66 |

|          |                                                                                    |                                             |       |        |    |
|----------|------------------------------------------------------------------------------------|---------------------------------------------|-------|--------|----|
|          | 1,2,3,4,5,6,7,8,9,11,12,14,15,16-tetradecahydrocyclopenta[a]phenanthrene-3,17-diol |                                             |       |        |    |
| 22096564 | [1-methyl-2-[(1,2,2-trimethyl-3-bicyclo[3.1.0]hexanyl)methyl]cyclopropyl]methanol  | <chem>CC1(C(CC2C1(C2)C)CC3CC3(C)CO)C</chem> | FALSE | 0.2344 | 67 |
| 535224   | 1,7,7-trimethylbicyclo[2.2.1]heptane-2,5-diol                                      | <chem>CC1(C2CC(C1(CC2O)C)O)C</chem>         | FALSE | 0.2321 | 68 |
| 11768995 | (1R,2S,3R,4S)-1,7,7-trimethylbicyclo[2.2.1]heptane-2,3-diol                        | <chem>CC1(C2CCC1(C(C2O)O)C)C</chem>         | FALSE | 0.2281 | 69 |
| 101680   | 2,3,3-trimethylbicyclo[2.2.1]heptan-2-ol                                           | <chem>CC1(C2CCC(C2)C1(C)O)C</chem>          | FALSE | 0.2264 | 70 |
| 6997371  | (1R,2R,4S)-1,3,3-trimethylbicyclo[2.2.1]heptan-2-ol                                | <chem>CC1(C2CCC(C2)(C1O)C)C</chem>          | FALSE | 0.2075 | 71 |
| 15406    | 1,3,3-trimethylbicyclo[2.2.1]heptan-2-ol                                           | <chem>CC1(C2CCC(C2)(C1O)C)C</chem>          | FALSE | 0.2075 | 72 |
| 6973643  | (1R,2S,4S)-1,3,3-trimethylbicyclo[2.2.1]heptan-2-ol                                | <chem>CC1(C2CCC(C2)(C1O)C)C</chem>          | FALSE | 0.2075 | 73 |
| 439711   | (1S,2S,4R)-1,3,3-trimethylbicyclo[2.2.1]heptan-2-ol                                | <chem>CC1(C2CCC(C2)(C1O)C)C</chem>          | FALSE | 0.2075 | 74 |
| 15559490 | (4R,4aR,8aS)-4,8a-dimethyl-1,2,3,4,5,6,7,8-octahydronaphthalen-4a-ol               | <chem>CC1CCCC2(C1(CCCC2)O)C</chem>          | FALSE | 0.2    | 75 |
| 10966107 | (1R,3aS,4S,7aS)-5-ethenyl-1,3a,4,7a-tetramethyl-1,2,3,4,6,7-hexahydroinden-5-ol    | <chem>CC1CCC2(C1(CCC(C2C)(C=C)O)C)C</chem>  | FALSE | 0.2    | 76 |
| 142315   | 3,7,7-trimethylbicyclo[4.1.0]heptan-3-ol                                           | <chem>CC1(C2C1CC(CC2)(C)O)C</chem>          | FALSE | 0.2    | 77 |

|              |                                                                                                                                                          |                                                         |       |        |    |
|--------------|----------------------------------------------------------------------------------------------------------------------------------------------------------|---------------------------------------------------------|-------|--------|----|
| 1213         | 4,8a-dimethyl-1,2,3,4,5,6,7,8-octahydronaphthalen-4a-ol                                                                                                  | <chem>CC1CCCC2(C1(CCCC2)O)C</chem>                      | FALSE | 0.2    | 78 |
| 29746        | (4S,4aS,8aR)-4,8a-dimethyl-1,2,3,4,5,6,7,8-octahydronaphthalen-4a-ol                                                                                     | <chem>CC1CCCC2(C1(CCCC2)O)C</chem>                      | FALSE | 0.2    | 79 |
| 101967       | (3R,5R,8R,9S,10S,13S,14S,17R)-17-[(1S)-1-hydroxyethyl]-10,13-dimethyl-1,2,3,4,5,6,7,8,9,11,12,14,15,16-tetradecahydrocyclopenta[a]phenanthrene-3,17-diol | <chem>CC(C1(CCC2C1(CCC3C2CCC4C3(CCC(C4)O)C)C)O)O</chem> | FALSE | 0.1977 | 80 |
| 303283<br>3  | (3R,5R,8R,9S,10S,13S,14S,17R)-17-(1-hydroxyethyl)-10,13-dimethyl-1,2,3,4,5,6,7,8,9,11,12,14,15,16-tetradecahydrocyclopenta[a]phenanthrene-3,17-diol      | <chem>CC(C1(CCC2C1(CCC3C2CCC4C3(CCC(C4)O)C)C)O)O</chem> | FALSE | 0.1977 | 81 |
| 107217       | (1,3,3-trimethyl-2-bicyclo[2.2.1]heptanyl) acetate                                                                                                       | <chem>CC(=O)OC1C(C2CCC1(C2)C)(C)C</chem>                | FALSE | 0.193  | 82 |
| 642710<br>2  | [(2S)-1,3,3-trimethyl-2-bicyclo[2.2.1]heptanyl] acetate                                                                                                  | <chem>CC(=O)OC1C(C2CCC1(C2)C)(C)C</chem>                | FALSE | 0.193  | 83 |
| 140192<br>66 | [(1S,2S,4R)-1,3,3-trimethyl-2-bicyclo[2.2.1]heptanyl] acetate                                                                                            | <chem>CC(=O)OC1C(C2CCC1(C2)C)(C)C</chem>                | FALSE | 0.193  | 84 |
| 211450<br>50 | (1S,4S,5S)-5-hydroxy-1,7,7-trimethylbicyclo[2.2.1]heptan-2-one                                                                                           | <chem>CC1(C2CC(=O)C1(CC2O)C)C</chem>                    | TRUE  | 0.1897 | 85 |
| 189214       | 5-hydroxy-4,7,7-trimethylbicyclo[2.2.1]heptan-2-one                                                                                                      | <chem>CC1(C2CC(C1(CC2=O)C)O)C</chem>                    | FALSE | 0.1897 | 86 |

|              |                                                                                                                                                                           |                                                                        |       |        |    |
|--------------|---------------------------------------------------------------------------------------------------------------------------------------------------------------------------|------------------------------------------------------------------------|-------|--------|----|
| 447414       | (1R,4R,5R)-5-hydroxy-1,7,7-trimethylbicyclo[2.2.1]heptan-2-one                                                                                                            | <chem>CC1(C2CC(=O)C1(CC2O)C)C</chem>                                   | TRUE  | 0.1897 | 87 |
| 891452<br>81 | 5,7,8-trimethyltricyclo[5.2.1.02,6]decan-8-ol                                                                                                                             | <chem>CC1CCC2C1C3(CC2CC3(C)O)C</chem>                                  | FALSE | 0.1846 | 88 |
| 163418       | 8-ethyl-1,5-dimethylbicyclo[3.2.1]octan-8-ol                                                                                                                              | <chem>CCC1(C2(CCCC1(CC2)C)C)O</chem>                                   | FALSE | 0.1833 | 89 |
| 521200       | 2,6,6,9-tetramethyltricyclo[5.4.0.02,9]undecan-8-ol                                                                                                                       | <chem>CC1(CCCC2(C3C1C(C2(CC3)C)O)C)C</chem>                            | FALSE | 0.1831 | 90 |
| 637210       | (1R,2R,5R,6R,9S,12S,13R)-6,9,12-trimethyl-5-propan-2-yltetracyclo[7.5.0.01,13.02,6]tetradecan-12-ol                                                                       | <chem>CC(C)C1CCC2C1(CCC3(C24CC4C(CC3)(C)O)C)C</chem>                   | FALSE | 0.1765 | 91 |
| 906585<br>79 | 2-[(3S,3aS,5aR,5bR,7aS,11aS,11bR,13aR,13bS)-5a,5b,8,8,10,11a,13b-heptamethyl-1,2,3,3a,4,5,6,7,7a,9,10,11,11b,12,13,13a-hexadecahydrocyclopenta[a]chrysen-3-yl]propan-2-ol | <chem>CC1CC(C2CCC3(C(C2(C1)C)CCC4C3(CCC5C4(CCC5C(C)(C)O)C)C)C)C</chem> | FALSE | 0.1727 | 92 |
| 107754<br>24 | (1S,4S,7S,8R,11R)-2,2,4,8-tetramethyltricyclo[5.3.1.04,11]undecan-11-ol                                                                                                   | <chem>CC1CCC2C(CC3(C2(C1CC3)O)C)(C)C</chem>                            | FALSE | 0.169  | 93 |
| 164874       | 2-[(3S,3aS,5aR,5bR,7aS,11aS,11bR,13aR,13bS)-5a,5b,8,8,11a,13b-hexamethyl-                                                                                                 | <chem>CC1(CCCC2(C1CCC3(C2CCC4C3(CCC5C4(CCC5C(C)(C)O)C)C)C)C</chem>     | FALSE | 0.1545 | 94 |

|          |                                                                                              |                                                |       |        |     |
|----------|----------------------------------------------------------------------------------------------|------------------------------------------------|-------|--------|-----|
|          | 1,2,3,3a,4,5,6,7,7a,9,10,11,11b,12,13,13a-hexadecahydrocyclopenta[a]chrysen-3-yl]propan-2-ol |                                                |       |        |     |
| 117290   | 1-ethynyl-2,2,6-trimethylcyclohexan-1-ol                                                     | <chem>CC1CCCC(C1(C#C)O)(C)C</chem>             | FALSE | 0.1538 | 95  |
| 578221   | (2,3-dimethyl-3-tricyclo[2.2.1.02,6]heptanyl)methanol                                        | <chem>CC1(C2CC3C1(C3C2)C)CO</chem>             | FALSE | 0.1538 | 96  |
| 1268143  | (1R,2R,5S)-2,6,6-trimethylbicyclo[3.1.1]heptan-2-ol                                          | <chem>CC1(C2CCC(C1C2)(C)O)C</chem>             | FALSE | 0.1455 | 97  |
| 10128    | 2,6,6-trimethylbicyclo[3.1.1]heptan-2-ol                                                     | <chem>CC1(C2CCC(C1C2)(C)O)C</chem>             | FALSE | 0.1455 | 98  |
| 6428289  | (1R,2S,5S)-2,6,6-trimethylbicyclo[3.1.1]heptan-2-ol                                          | <chem>CC1(C2CCC(C1C2)(C)O)C</chem>             | FALSE | 0.1455 | 99  |
| 86619    | 2-methoxy-6-(2,3,3-trimethyl-2-bicyclo[2.2.1]heptanyl)cyclohexan-1-ol                        | <chem>CC1(C2CCC(C2)C1(C)C3CCCC(C3O)OC)C</chem> | FALSE | 0.1447 | 100 |
| 221170   | 2-hydroperoxy-2,6,6-trimethylbicyclo[3.1.1]heptane                                           | <chem>CC1(C2CCC(C1C2)(C)OO)C</chem>            | FALSE | 0.1379 | 101 |
| 10353    | 2-(4-methylcyclohexyl)propan-2-ol                                                            | <chem>CC1CCC(CC1)C(C)(C)O</chem>               | FALSE | 0.1333 | 102 |
| 368926   | 2,6,6,9-tetramethyltricyclo[5.4.0.02,9]undecane-8,11-diol                                    | <chem>CC1(CCCC2(C3C1C(C2(CC3O)C)O)C)C</chem>   | FALSE | 0.1299 | 103 |
| 21119328 | (1S,2R,7R,8R,9S,11R)-2,6,6,9-tetramethyltricyclo[5.4.0.02,9]undecane-8,11-diol               | <chem>CC1(CCCC2(C3C1C(C2(CC3O)C)O)C)C</chem>   | FALSE | 0.1299 | 104 |
| 379930   | 1,5,5-trimethylbicyclo[2.2.1]heptan-2-ol                                                     | <chem>CC1(CC2(CC1CC2O)C)C</chem>               | FALSE | 0.1273 | 105 |

|              |                                                                                                       |                                          |       |        |     |
|--------------|-------------------------------------------------------------------------------------------------------|------------------------------------------|-------|--------|-----|
| 165258       | (1R,4aR,7R,8aR)-7-(2-hydroxypropan-2-yl)-1,4a-dimethyl-2,3,4,5,6,7,8,8a-octahydronaphthalen-1-ol      | CC12CCCC(C1CC(CC2)C(C)(C)O)(C)O          | FALSE | 0.127  | 106 |
| 529408<br>54 | (1R,4aR,8aR)-7-(2-hydroxypropan-2-yl)-1,4a-dimethyl-2,3,4,5,6,7,8,8a-octahydronaphthalen-1-ol         | CC12CCCC(C1CC(CC2)C(C)(C)O)(C)O          | FALSE | 0.127  | 107 |
| 465587<br>6  | 7-(2-hydroxypropan-2-yl)-1,4a-dimethyl-2,3,4,5,6,7,8,8a-octahydronaphthalen-1-ol                      | CC12CCCC(C1CC(CC2)C(C)(C)O)(C)O          | FALSE | 0.127  | 108 |
| 851579<br>52 | 7-(2-hydroxypropan-2-yl)-1,4a-dimethyl-2,3,4,5,6,7,8,8a-octahydro-1H-naphthalen-2-ol                  | CC1C(CCC2(C1CC(CC2)C(C)(C)O)C)O          | FALSE | 0.127  | 109 |
| 442373<br>48 | (1S,9S,13R,14R)-5,5,9,14-tetramethyltetracyclo[11.2.1.01,10.04,9]hexadecan-14-ol                      | CC1(CCCC2(C1CCC34C2CCC(C3)C(C4)(C)O)C)C  | FALSE | 0.1176 | 110 |
| 623309       | 5,5,9,14-tetramethyltetracyclo[11.2.1.01,10.04,9]hexadecan-14-ol                                      | CC1(CCCC2(C1CCC34C2CCC(C3)C(C4)(C)O)C)C  | FALSE | 0.1176 | 111 |
| 215936<br>07 | (1S,4R,9R,10R,13R,14R)-5,5,9,14-tetramethyltetracyclo[11.2.1.01,10.04,9]hexadecan-14-ol               | CC1(CCCC2(C1CCC34C2CCC(C3)C(C4)(C)O)C)C  | FALSE | 0.1176 | 112 |
| 121120<br>93 | (1S,4R,9R,10R,13R,14S)-14-(hydroxymethyl)-5,5,9-trimethyltetracyclo[11.2.1.01,10.04,9]hexadecan-14-ol | CC1(CCCC2(C1CCC34C2CCC(C3)C(C4)(CO)O)C)C | FALSE | 0.1136 | 113 |

|              |                                                                                                                |                                                         |       |        |     |
|--------------|----------------------------------------------------------------------------------------------------------------|---------------------------------------------------------|-------|--------|-----|
| 261961<br>28 | (1S,4S,6R,9S,10R,13R,14R)-14-(hydroxymethyl)-5,5,9-trimethyltetracyclo[11.2.1.01,10.04,9]he xadecane-6,14-diol | <chem>CC1(C2CCC34CC(CCCC3C2(CCC1O)C)C(C4)(CO)O)C</chem> | FALSE | 0.1087 | 114 |
| 224766<br>45 | 1-methyl-3-(2-methylpropyl)cyclohexan-1-ol                                                                     | <chem>CC(C)CC1CCCC(C1)(C)O</chem>                       | FALSE | 0.1087 | 115 |
| 596186       | 4,4,8-trimethyltricyclo[6.3.1.01,5]dodecane-2,9-diol                                                           | <chem>CC1(CC(C23C1CCC(C2)(C(CC3)O)C)O)C</chem>          | FALSE | 0.1081 | 116 |
| 763193<br>62 | (1S,2S,8R,9R)-4,4,8-trimethyltricyclo[6.3.1.01,5]dodecane-2,9-diol                                             | <chem>CC1(CC(C23C1CCC(C2)(C(CC3)O)C)O)C</chem>          | FALSE | 0.1081 | 117 |
| 155998<br>78 | (1S,2S,5S,8R,9R)-4,4,8-trimethyltricyclo[6.3.1.01,5]dodecane-2,9-diol                                          | <chem>CC1(CC(C23C1CCC(C2)(C(CC3)O)C)O)C</chem>          | FALSE | 0.1081 | 118 |
| 85998        | 2-(3,3-dimethyl-2-bicyclo[2.2.1]heptanyl)ethanol                                                               | <chem>CC1(C2CCC(C2)C1CCO)C</chem>                       | FALSE | 0.1053 | 119 |
| 106672       | 1-(3,3-dimethyl-2-bicyclo[2.2.1]heptanyl)ethanol                                                               | <chem>CC(C1C2CCC(C2)C1(C)C)O</chem>                     | FALSE | 0.1034 | 120 |
| 99843        | 3,3-dimethylbicyclo[2.2.1]heptane-2-carboxylic acid                                                            | <chem>CC1(C2CCC(C2)C1C(=O)O)C</chem>                    | FALSE | 0.1034 | 121 |
| 223261<br>87 | 1-(2,2,3,6-tetramethylcyclohexyl)hexan-3-ol                                                                    | <chem>CCCC(CCC1C(CCC(C1(C)C)C)C)O</chem>                | FALSE | 0.1034 | 122 |
| 137834       | 2-tert-butyl-5-methylcyclohexan-1-ol                                                                           | <chem>CC1CCC(C(C1)O)C(C)(C)C</chem>                     | FALSE | 0.102  | 123 |

|              |                                                                                                                     |                                                               |       |        |     |
|--------------|---------------------------------------------------------------------------------------------------------------------|---------------------------------------------------------------|-------|--------|-----|
| 61125        | 4,4,8-trimethyltricyclo[6.3.1.02,5]dodecan-1-ol                                                                     | <chem>CC1(CC2C1CCC3(CCCC2(C3)O)C)C</chem>                     | FALSE | 0.1014 | 124 |
| 117462<br>18 | (1R,2S,5R,8S)-4,4,8-trimethyltricyclo[6.3.1.02,5]dodecan-1-ol                                                       | <chem>CC1(CC2C1CCC3(CCCC2(C3)O)C)C</chem>                     | FALSE | 0.1014 | 125 |
| 110204<br>95 | (1aS,4aR,5R,7aS,7bR)-3,3,5,7b-tetramethyl-1,1a,2,4,5,6,7,7a-octahydrocyclopropa[h]azulen-4a-ol                      | <chem>CC1CCC2C1(CC(CC3C2(C3)C)(C)C)O</chem>                   | FALSE | 0.0986 | 126 |
| 110577<br>30 | (1S,3R,4R,6S,8S,9R,10R,13R,14R,16R)-5,5,9,14-tetramethyltetracyclo[11.2.1.01,10.04,8]hexadecane-3,4,6,9,14,16-hexol | <chem>CC1(C(CC2C1(C(CC34CC(C(C3O)CCC4C2(C)O)(C)O)O)O)C</chem> | FALSE | 0.0943 | 127 |
| 3511         | 5,5,9,14-tetramethyltetracyclo[11.2.1.01,10.04,8]hexadecane-3,4,6,9,14,16-hexol                                     | <chem>CC1(C(CC2C1(C(CC34CC(C(C3O)CCC4C2(C)O)(C)O)O)O)C</chem> | FALSE | 0.0943 | 128 |
| 207666       | (3R,4R,6R,8S,9R,10R,14R,16S)-5,5,9,14-tetramethyltetracyclo[11.2.1.01,10.04,8]hexadecane-3,4,6,9,14,16-hexol        | <chem>CC1(C(CC2C1(C(CC34CC(C(C3O)CCC4C2(C)O)(C)O)O)O)C</chem> | FALSE | 0.0943 | 129 |
| 1.29E+<br>08 | (1R,5R,7S,8R)-2,6,6,8-tetramethyltricyclo[5.3.1.01,5]undecan-8-ol                                                   | <chem>CC1CCC2C13CCC(C(C3)C2(C)C)(C)O</chem>                   | FALSE | 0.0933 | 130 |
| 522667       | 2,6,6,8-tetramethyltricyclo[5.3.1.01,5]undecan-8-ol                                                                 | <chem>CC1CCC2C13CCC(C(C3)C2(C)C)(C)O</chem>                   | FALSE | 0.0933 | 131 |

|              |                                                                      |                                |       |        |     |
|--------------|----------------------------------------------------------------------|--------------------------------|-------|--------|-----|
| 670866<br>5  | (2R,5S,8R)-2,6,6,8-tetramethyltricyclo[5.3.1.01,5]undecan-8-ol       | CC1CCC2C13CCC(C(C3)C2(C)C)(C)O | FALSE | 0.0933 | 132 |
| 65575        | (1S,2R,5S,7R,8R)-2,6,6,8-tetramethyltricyclo[5.3.1.01,5]undecan-8-ol | CC1CCC2C13CCC(C(C3)C2(C)C)(C)O | FALSE | 0.0933 | 133 |
| 1.46E+<br>08 | (1S,8R)-2,6,6,8-tetramethyltricyclo[5.3.1.01,5]undecan-8-ol          | CC1CCC2C13CCC(C(C3)C2(C)C)(C)O | FALSE | 0.0933 | 134 |
| 123026<br>03 | (1R,2R,5S,7R,8R)-2,6,6,8-tetramethyltricyclo[5.3.1.01,5]undecan-8-ol | CC1CCC2C13CCC(C(C3)C2(C)C)(C)O | FALSE | 0.0933 | 135 |
| 1.35E+<br>08 | (2R,7R,8R)-2,6,6,8-tetramethyltricyclo[5.3.1.01,5]undecan-8-ol       | CC1CCC2C13CCC(C(C3)C2(C)C)(C)O | FALSE | 0.0933 | 136 |
| 643270<br>9  | (8S)-2,6,6,8-tetramethyltricyclo[5.3.1.01,5]undecan-8-ol             | CC1CCC2C13CCC(C(C3)C2(C)C)(C)O | FALSE | 0.0933 | 137 |
| 671307<br>8  | (1S,2R,5S,7R,8S)-2,6,6,8-tetramethyltricyclo[5.3.1.01,5]undecan-8-ol | CC1CCC2C13CCC(C(C3)C2(C)C)(C)O | FALSE | 0.0933 | 138 |
| 728550<br>2  | (1R,2R,5R,7S,8R)-2,6,6,8-tetramethyltricyclo[5.3.1.01,5]undecan-8-ol | CC1CCC2C13CCC(C(C3)C2(C)C)(C)O | FALSE | 0.0933 | 139 |
| 108424       | 1-(2,2,6-trimethylcyclohexyl)pentan-3-ol                             | CCC(CCC1C(CCCC1(C)C)C)O        | FALSE | 0.0926 | 140 |

|              |                                                                                                                           |                                                     |       |        |     |
|--------------|---------------------------------------------------------------------------------------------------------------------------|-----------------------------------------------------|-------|--------|-----|
| 116699       | 1-(2,2,6-trimethylcyclohexyl)hexan-3-ol                                                                                   | CCCC(CCC1C(CCCC1(C)C)C)O                            | FALSE | 0.0909 | 141 |
| 110857<br>96 | (1S,2R,5S,7R,8R)-8-methoxy-2,6,6,8-tetramethyltricyclo[5.3.1.01,5]undecane                                                | CC1CCC2C13CCC(C(C3)C2(C)C)(C)OC                     | FALSE | 0.0897 | 142 |
| 247581<br>99 | 8-methoxy-2,6,6,8-tetramethyltricyclo[5.3.1.01,5]undecane                                                                 | CC1CCC2C13CCC(C(C3)C2(C)C)(C)OC                     | FALSE | 0.0897 | 143 |
| 88288        | (1S,2R,5S,7R,8S)-8-methoxy-2,6,6,8-tetramethyltricyclo[5.3.1.01,5]undecane                                                | CC1CCC2C13CCC(C(C3)C2(C)C)(C)OC                     | FALSE | 0.0897 | 144 |
| 433104       | 5,5,9,14-tetramethyltetracyclo[11.2.1.01,10.04,8]hexadecane-3,4,6,14,16-pentol                                            | CC1C2CCC3C(C2(CC(C4(C1CC(C4(C)C)O)O)O)CC3(C)O)O     | FALSE | 0.0874 | 145 |
| 171535       | 5,5,9,14-tetramethyltetracyclo[11.2.1.01,10.04,8]hexadecane-2,3,4,6,9,14,16-heptol                                        | CC1(C(CC2C1(C(C(C34CC(C(C3O)CCC4C2(C)O)(C)O)O)O)O)C | FALSE | 0.0804 | 146 |
| 445593<br>53 | (1R,2S,3R,4R,6S,8S,9R,10R,13R,14R,16R)-5,5,9,14-tetramethyltetracyclo[11.2.1.01,10.04,8]hexadecane-2,3,4,6,9,14,16-heptol | CC1(C(CC2C1(C(C(C34CC(C(C3O)CCC4C2(C)O)(C)O)O)O)O)C | FALSE | 0.0804 | 147 |
| 107272       | 4-(2,2,6-trimethylcyclohexyl)butan-2-ol                                                                                   | CC1CCCC(C1CCC(C)O)(C)C                              | FALSE | 0.0755 | 148 |
| 920300<br>06 | 2,2,6,6,7,8,8-heptamethyl-3,3a,4,5,5a,7,8a,8b-octahydrocyclopenta[g][1]benzofuran                                         | CC1C(C2CCC3CC(OC3C2C1(C)C)(C)C)(C)C                 | FALSE | 0.075  | 149 |
| 123152<br>74 | 2,3-dimethylbicyclo[2.2.1]heptan-2-ol                                                                                     | CC1C2CCC(C2)C1(C)O                                  | FALSE | 0.0714 | 150 |
| 148415<br>56 | (3S,4S,5S,8S,9S,10R,13R,14S,17R)-4,10,13-trimethyl-17-[(2R)-6-methylheptan-2-yl]-                                         | CC1C2CCC3C4CCC(C4(CCC3C2(CCC1O)C)C)C(C)CCCC(C)C     | FALSE | 0.07   | 151 |

|              |                                                                                                    |                                               |       |        |     |
|--------------|----------------------------------------------------------------------------------------------------|-----------------------------------------------|-------|--------|-----|
|              | 2,3,4,5,6,7,8,9,11,12,14,15,16,17-tetradecahydro-1H-cyclopenta[a]phenanthren-3-ol                  |                                               |       |        |     |
| 103005       | 3-(5,5,6-trimethyl-2-bicyclo[2.2.1]heptanyl)cyclohexan-1-ol                                        | <chem>CC1C2CC(C1(C)C)CC2C3CCCC(C3)O</chem>    | FALSE | 0.0694 | 152 |
| 106673       | 4-(5,5,6-trimethyl-2-bicyclo[2.2.1]heptanyl)cyclohexan-1-ol                                        | <chem>CC1C2CC(C1(C)C)CC2C3CCC(CC3)O</chem>    | FALSE | 0.0694 | 153 |
| 109188       | 3-(5,5-dimethyl-6-methylidene-2-bicyclo[2.2.1]heptanyl)cyclohexan-1-ol                             | <chem>CC1(C2CC(C(C2)C1=C)C3CCCC(C3)O)C</chem> | FALSE | 0.0694 | 154 |
| 526611       | 5,5-dimethyl-6-methylidenebicyclo[2.2.1]heptan-2-ol                                                | <chem>CC1(C2CC(C1=C)C(C2)O)C</chem>           | FALSE | 0.0678 | 155 |
| 99038        | 2,6,6-trimethylbicyclo[3.1.1]heptan-3-ol                                                           | <chem>CC1C2CC(C2(C)C)CC1O</chem>              | FALSE | 0.0678 | 156 |
| 727180<br>3  | (1S,2R,3R,5R)-2,6,6-trimethylbicyclo[3.1.1]heptan-3-ol                                             | <chem>CC1C2CC(C2(C)C)CC1O</chem>              | FALSE | 0.0678 | 157 |
| 90350        | (1S,2S,3S,5R)-2,6,6-trimethylbicyclo[3.1.1]heptan-3-ol                                             | <chem>CC1C2CC(C2(C)C)CC1O</chem>              | FALSE | 0.0678 | 158 |
| 105249<br>83 | (1R,2R,3R,5S)-2,6,6-trimethylbicyclo[3.1.1]heptan-3-ol                                             | <chem>CC1C2CC(C2(C)C)CC1O</chem>              | FALSE | 0.0678 | 159 |
| 109440<br>69 | (1aR,3aS,7S,7aS,7bR)-1,1,3a,7-tetramethyl-1a,2,3,4,5,6,7a,7b-octahydrocyclopropa[a]naphthalen-7-ol | <chem>CC1(C2C1C3C(CCCC3(C)O))(CC2)C)C</chem>  | FALSE | 0.0676 | 160 |
| 521185       | 1,4,4,7-tetramethyltricyclo[5.3.1.02,6]undecan-11-ol                                               | <chem>CC1(CC2C(C1)C3(CCCC2(C3O)C)C)C</chem>   | FALSE | 0.0658 | 161 |

|              |                                                                                                                           |                                                       |       |        |     |
|--------------|---------------------------------------------------------------------------------------------------------------------------|-------------------------------------------------------|-------|--------|-----|
| 140381<br>23 | (1S,2R,6S,7R)-1,4,4,7-tetramethyltricyclo[5.3.1.02,6]undecan-11-ol                                                        | CC1(CC2C(C1)C3(CCCC2(C3O)C)C)C                        | FALSE | 0.0658 | 162 |
| 164822       | 1,2-dimethylcyclohexan-1-ol                                                                                               | CC1CCCCC1(C)O                                         | FALSE | 0.0652 | 163 |
| 115818<br>15 | (1S,3R,4R,6R,7R,8S,9R,10R,13R,14R,16R)-5,5,9,14-tetramethyltetracyclo[11.2.1.01,10.04,8]hexadecane-3,4,6,7,9,14,16-heptol | CC1(C(C(C2C1(C(CC34CC(C(C3O)CCC4C2(C)O)(C)O)O)O)O)O)C | FALSE | 0.0619 | 164 |
| 110420<br>78 | (1R,3aR,4S,7aR)-1-[(2S)-1-hydroxypropan-2-yl]-7a-methyl-1,2,3,3a,4,5,6,7-octahydroinden-4-ol                              | CC(CO)C1CCC2C1(CCCC2O)C                               | FALSE | 0.0615 | 165 |
| 174845       | 1-(4-ethyl-2-bicyclo[2.2.1]heptanyl)cyclohexan-1-ol                                                                       | CCC12CCC(C1)C(C2)C3(CCCCC3)O                          | FALSE | 0.0571 | 166 |
| 110745       | 1,1,4,7-tetramethyl-2,3,4,5,6,7,7a,7b-octahydro-1aH-cyclopropa[h]azulen-4a-ol                                             | CC1CCC2(C1C3C(C3(C)C)CCC2C)O                          | FALSE | 0.0526 | 167 |
| 572865       | (3,3,7-trimethyl-8-tricyclo[5.4.0.02,9]undecanyl)methanol                                                                 | CC1(CCCC2(C3C1C(C2CO)CC3)C)C                          | FALSE | 0.0526 | 168 |
| 108425       | 3-methyl-4-(2,2,6-trimethylcyclohexyl)butan-2-ol                                                                          | CC1CCCC(C1CC(C)C(C)O)(C)C                             | FALSE | 0.0526 | 169 |
| 123110<br>96 | [(1R,2S,7S,8S,9S)-3,3,7-trimethyl-8-tricyclo[5.4.0.02,9]undecanyl]methanol                                                | CC1(CCCC2(C3C1C(C2CO)CC3)C)C                          | FALSE | 0.0526 | 170 |
| 536562       | 3,7,7-trimethylbicyclo[4.1.0]heptan-2-ol                                                                                  | CC1CCC2C(C1O)C2(C)C                                   | FALSE | 0.0508 | 171 |
| 632618<br>1  | (1R,2R,5S)-2-methyl-5-propan-2-ylbicyclo[3.1.0]hexan-2-ol                                                                 | CC(C)C12CCC(C1C2)(C)O                                 | FALSE | 0.05   | 172 |

|              |                                                                                    |                                                 |       |        |     |
|--------------|------------------------------------------------------------------------------------|-------------------------------------------------|-------|--------|-----|
| 112289<br>20 | (1S,2S,5R)-2-methyl-5-propan-2-ylbicyclo[3.1.0]hexan-2-ol                          | <chem>CC(C)C12CCC(C1C2)(C)O</chem>              | FALSE | 0.05   | 173 |
| 573579<br>74 | 2,6,6,7,8,8-hexamethyl-3,3a,4,5,5a,7,8a,8b-octahydro-2H-cyclopenta[g][1]benzofuran | <chem>CC1CC2CCC3C(C2O1)C(C(C3(C)C)C)(C)C</chem> | FALSE | 0.05   | 174 |
| 62367        | 2-methyl-5-propan-2-ylbicyclo[3.1.0]hexan-2-ol                                     | <chem>CC(C)C12CCC(C1C2)(C)O</chem>              | FALSE | 0.05   | 175 |
| 162188<br>17 | 2-methyl-5-propan-2-ylbicyclo[3.1.0]hexan-2-ol;hydrate                             | <chem>CC(C)C12CCC(C1C2)(C)O.O</chem>            | FALSE | 0.05   | 176 |
| 671598<br>78 | (1R,5S)-2-methyl-5-propan-2-ylbicyclo[3.1.0]hexan-2-ol                             | <chem>CC(C)C12CCC(C1C2)(C)O</chem>              | FALSE | 0.05   | 177 |
| 200555<br>23 | (1R,2S,5S)-2-methyl-5-propan-2-ylbicyclo[3.1.0]hexan-2-ol                          | <chem>CC(C)C12CCC(C1C2)(C)O</chem>              | FALSE | 0.05   | 178 |
| 117448<br>54 | (1S,2R,5R)-2-methyl-5-propan-2-ylbicyclo[3.1.0]hexan-2-ol                          | <chem>CC(C)C12CCC(C1C2)(C)O</chem>              | FALSE | 0.05   | 179 |
| 1.18E+<br>08 | 1-ethyl-2-(3-methylbutyl)cyclopentan-1-ol                                          | <chem>CCC1(CCCC1CCC(C)C)O</chem>                | FALSE | 0.037  | 180 |
| 564727       | 4,7,7-trimethylbicyclo[4.1.0]heptan-2-ol                                           | <chem>CC1CC2C(C2(C)C)C(C1)O</chem>              | FALSE | 0.0339 | 181 |
| 738282<br>81 | 1,5-dimethyl-4-(2-methylprop-1-enyl)-1,2,3,4,5,6,7,7a-octahydroinden-3a-ol         | <chem>CC1CCC2C(CCC2(C1C=C(C)C)O)C</chem>        | FALSE | 0.0294 | 182 |
| 119762<br>03 | 4,10-dimethyl-7-propan-2-yltricyclo[4.4.0.01,5]decan-4-ol                          | <chem>CC1CCC(C2C13C2C(CC3)(C)O)C(C)C</chem>     | FALSE | 0.0253 | 183 |
| 112761<br>07 | (1R,4S,5R,6R,7S,10R)-4,10-dimethyl-7-propan-2-yltricyclo[4.4.0.01,5]decan-4-ol     | <chem>CC1CCC(C2C13C2C(CC3)(C)O)C(C)C</chem>     | FALSE | 0.0253 | 184 |

|              |                                                                                |                                      |       |        |     |
|--------------|--------------------------------------------------------------------------------|--------------------------------------|-------|--------|-----|
| 123042<br>17 | (1S,4S,5S,6S,7R,10S)-4,10-dimethyl-7-propan-2-yltricyclo[4.4.0.01,5]decan-4-ol | CC1CCC(C2C13C2C(CC3)(C)O)C(C)C       | FALSE | 0.0253 | 185 |
| 461871<br>90 | (1R,4S,5R,6R,7S,10S)-4,10-dimethyl-7-propan-2-yltricyclo[4.4.0.01,5]decan-4-ol | CC1CCC(C2C13C2C(CC3)(C)O)C(C)C       | FALSE | 0.0253 | 186 |
| 21308        | 2-bicyclo[2.2.1]heptanymethanol                                                | C1CC2CC1CC2CO                        | FALSE | 0.0189 | 187 |
| 98106        | 4-tricyclo[5.2.1.02,6]decanylmethanol                                          | C1CC2CC1C3C2CC(C3)CO                 | FALSE | 0.0154 | 188 |
| 568425<br>34 | 1-ethyl-3-methoxytricyclo[2.2.1.02,6]heptane                                   | CCC12CC3CC1C2C3OC                    | FALSE | 0.0143 | 189 |
| 160138       | [8-(hydroxymethyl)-3-tricyclo[5.2.1.02,6]decanyl]methanol                      | C1CC2C3CC(C2C1CO)CC3CO               | FALSE | 0.0141 | 190 |
| 109415       | spiro[oxolane-2,8'-tricyclo[5.2.1.02,6]decane]                                 | C1CC2C(C1)C3CC2CC34CCCO4             | FALSE | 0.0132 | 191 |
| 297765       | 3-(1,1,1,3,3,3-hexafluoro-2-hydroxypropan-2-yl)bicyclo[2.2.1]heptan-2-ol       | C1CC2CC1C(C2O)C(C(F)(F)F)(C(F)(F)F)O | FALSE | 0.0127 | 192 |
| 123046<br>03 | (1S,3S,4S,5R)-4-methyl-1-propan-2-ylbicyclo[3.1.0]hexan-3-ol                   | CC1C2CC2(CC1O)C(C)C                  | FALSE | 0      | 193 |
| 123046<br>10 | (1S,3S,4R,5R)-4-methyl-1-propan-2-ylbicyclo[3.1.0]hexan-3-ol                   | CC1C2CC2(CC1O)C(C)C                  | FALSE | 0      | 194 |
| 10550        | 4-methyl-1-propan-2-ylbicyclo[3.1.0]hexan-3-ol                                 | CC1C2CC2(CC1O)C(C)C                  | FALSE | 0      | 195 |
| 197929<br>60 | 2-ethyl-5-methoxybicyclo[2.2.1]heptane                                         | CCC1CC2CC1CC2OC                      | FALSE | 0      | 196 |

|              |                                                              |                                       |       |   |     |
|--------------|--------------------------------------------------------------|---------------------------------------|-------|---|-----|
| 123046<br>09 | (1R,3R,4S,5S)-4-methyl-1-propan-2-ylbicyclo[3.1.0]hexan-3-ol | <chem>CC1C2CC2(CC1O)C(C)C</chem>      | FALSE | 0 | 197 |
| 95606        | tricyclo[5.2.1.02,6]decan-8-ol                               | <chem>C1CC2C(C1)C3CC2CC3O</chem>      | FALSE | 0 | 198 |
| 98091        | [8-(hydroxymethyl)-4-tricyclo[5.2.1.02,6]decanyl]methanol    | <chem>C1C(CC2C1C3CC(C2C3)CO)CO</chem> | FALSE | 0 | 199 |
| 303432<br>0  | (1R,3R)-4-methyl-1-propan-2-ylbicyclo[3.1.0]hexan-3-ol       | <chem>CC1C2CC2(CC1O)C(C)C</chem>      | FALSE | 0 | 200 |

*Table S3. Main Parameters from Modified Randles Circuit Fitting for All EIS Samp*

| <b>Sample</b> | <b>Double Layer CPE<br/>(F·s<sup>n-1</sup>)</b> | <b>CPE Exponent for Double Layer</b> | <b>Charge Transfer Resistance<br/>(Ω)</b> | <b>R<sup>2</sup> Re(Z)</b> | <b>R<sup>2</sup> Im(Z)</b> |
|---------------|-------------------------------------------------|--------------------------------------|-------------------------------------------|----------------------------|----------------------------|
| <b>GCE</b>    | 1.322 × 10 <sup>-6</sup>                        | 0.893                                | 411.31                                    | 0.99994                    | 0.99958                    |
| <b>GCE_Au</b> | 2.884 × 10 <sup>-6</sup>                        | 0.849                                | 245.82                                    | 0.99996                    | 0.99976                    |
| <b>MIP</b>    | 1.940 × 10 <sup>-6</sup>                        | 0.865                                | 15,466.63                                 | 0.99994                    | 0.99992                    |
| <b>MIP_W</b>  | 3.439 × 10 <sup>-6</sup>                        | 0.868                                | 8,108.07                                  | 0.99993                    | 0.99994                    |
| <b>MIP_R</b>  | 3.847 × 10 <sup>-6</sup>                        | 0.883                                | 12,616.94                                 | 0.99977                    | 0.99990                    |

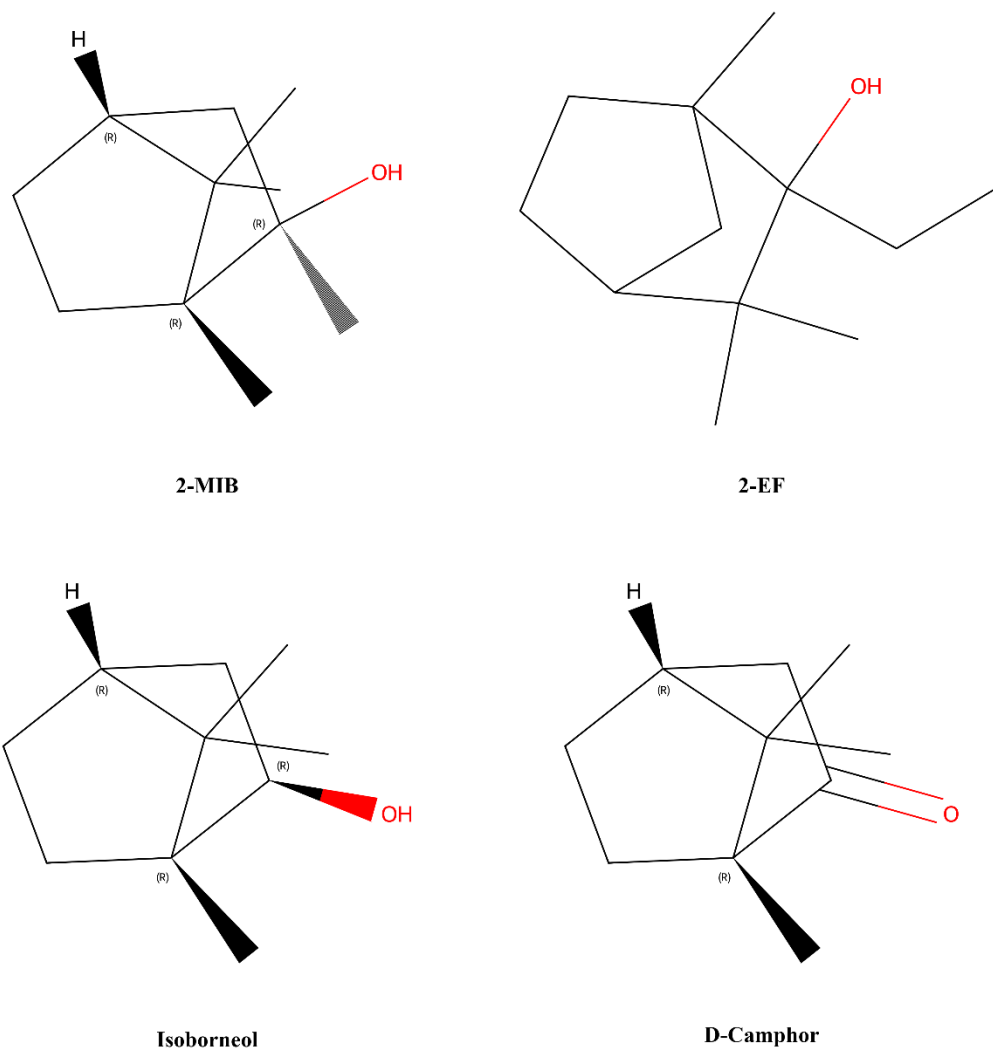

*Fig. S3. Chemical structures of 2-methylisoborneol (2-MIB) and its structural analogs evaluated for dummy template selection.*

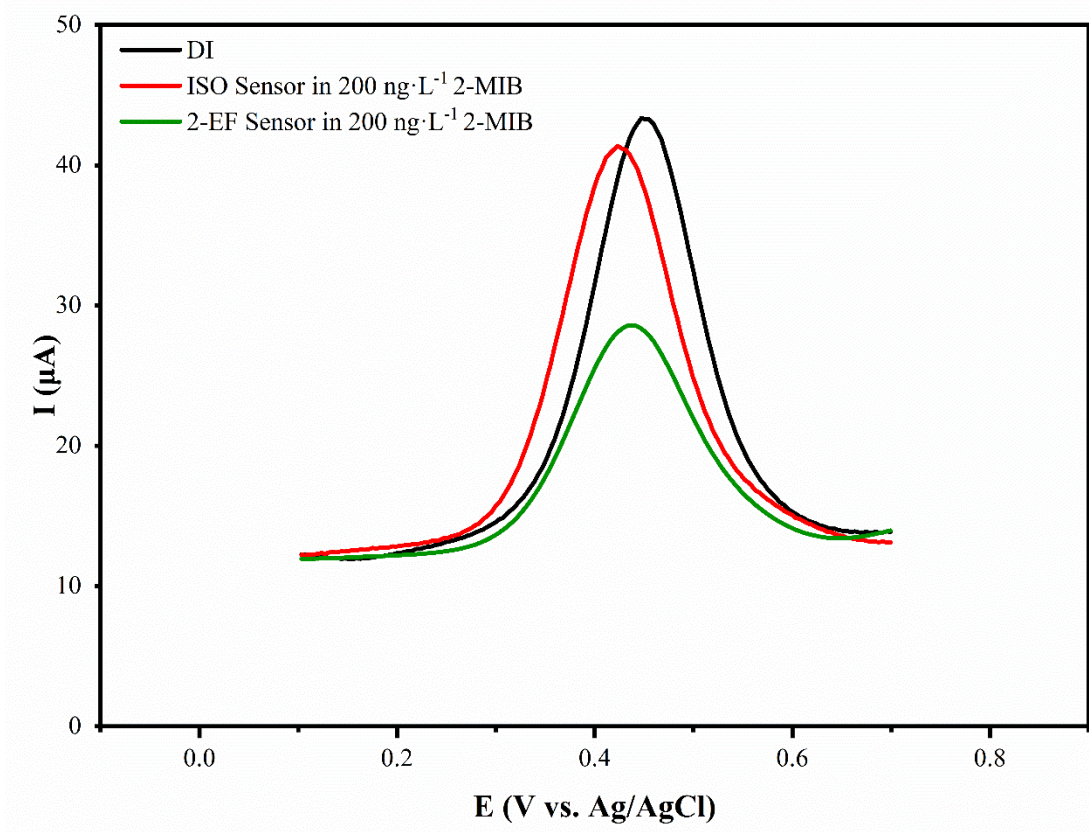

Fig. S4. Interference Evaluation of Structurally Related Compounds on the IHEN Sensor

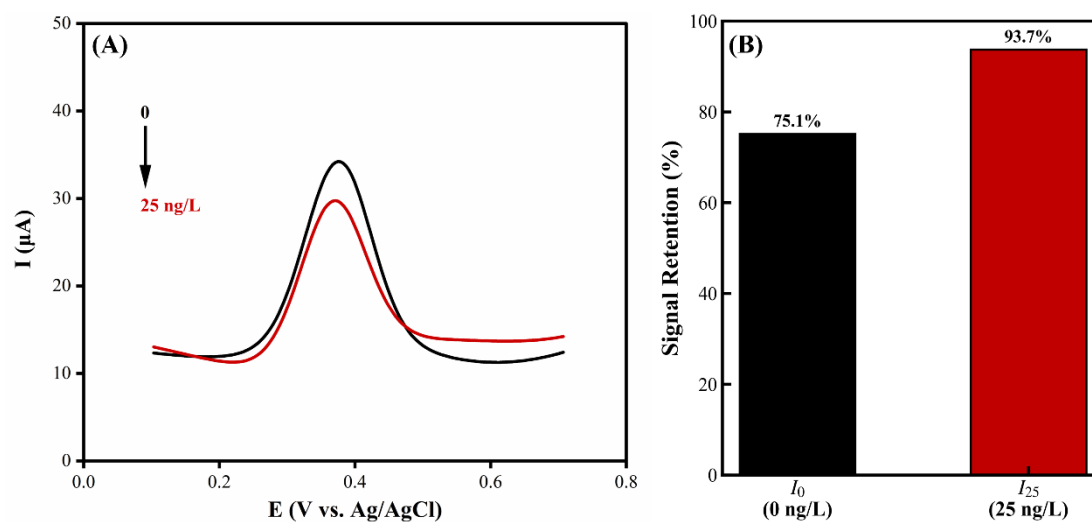

Figure S5. Long-term stability evaluation of the AuNP-MIP/GCE sensor. (A) Square wave voltammograms (SWV) recorded in DI water containing 0 ng/L and 25 ng/L 2-MIB after 7 days of storage at 4 °C. (B) Signal retention (%) of the peak currents at 0 ng/L ( $I_0$ ) and 25 ng/L ( $I_{25}$ ) after 7-day storage, normalized to the corresponding fresh-sensor values.

Section S1. Cartesian coordinates of input and optimized structures used in the DFT calculations

**S1.1 o-PD monomer (GFN2-xTB)**

16

o-Phenylenediamine (o-PD) monomer — GFN2-xTB optimized

|   |             |             |             |
|---|-------------|-------------|-------------|
| C | 1.53684638  | -0.75365675 | 1.13135483  |
| C | 1.27218251  | 0.54844948  | 1.51098941  |
| C | 0.25038586  | 1.24651626  | 0.89179167  |
| C | -0.53017748 | 0.66383880  | -0.09842175 |
| C | -0.26894261 | -0.66652971 | -0.47619759 |
| C | 0.77215505  | -1.34768197 | 0.14336670  |
| N | -1.07173316 | -1.33169849 | -1.39841304 |
| N | -1.59938098 | 1.37600856  | -0.64904038 |
| H | 2.33660328  | -1.30892211 | 1.59776103  |
| H | 1.86030806  | 1.02647276  | 2.27971232  |
| H | 0.04280301  | 2.26818838  | 1.18006279  |
| H | 0.97300723  | -2.36706516 | -0.15638698 |
| H | -0.64610719 | -2.14571618 | -1.81358847 |
| H | -1.56940285 | -0.76040365 | -2.06210824 |
| H | -1.80190143 | 1.18510032  | -1.61929761 |
| H | -1.55664666 | 2.36709745  | -0.46158569 |

**S1.2 2-MIB monomer (GFN2-xTB)**

35

2-Methylisoborneol (2-MIB) monomer — GFN2-xTB optimized

|   |             |             |             |
|---|-------------|-------------|-------------|
| C | -2.12743493 | -0.07702872 | 1.28705626  |
| C | -1.17269824 | -0.23139280 | 0.09371390  |
| C | 0.05677698  | -1.12955280 | 0.41105621  |
| C | 0.64849792  | -0.68648200 | 1.75753294  |
| C | 1.27700753  | 0.67957130  | 1.41190010  |
| C | 1.01822658  | 0.81211683  | -0.09751250 |
| C | -0.48758602 | 1.11711048  | -0.33347599 |
| O | -0.75843400 | 1.35801101  | -1.71086646 |
| C | -0.96726805 | 2.38008891  | 0.39578971  |
| C | 1.16883109  | -0.65355459 | -0.55818436 |
| C | 0.95862434  | -0.90840756 | -2.05334061 |
| C | 2.54940090  | -1.26466115 | -0.27190832 |
| C | -2.05203249 | -0.84334354 | -1.00656930 |
| H | -1.71768129 | 0.49140787  | 2.11360275  |
| H | -3.03587487 | 0.42273628  | 0.95951935  |
| H | -2.39923429 | -1.06436125 | 1.65583824  |
| H | -0.18295386 | -2.19153397 | 0.36956592  |
| H | -0.09640788 | -0.61796245 | 2.54396010  |
| H | 1.39255594  | -1.40320074 | 2.10266406  |
| H | 0.83897723  | 1.49279616  | 1.98451289  |

|   |             |             |             |
|---|-------------|-------------|-------------|
| H | 2.34838613  | 0.69656295  | 1.61088114  |
| H | 1.67122535  | 1.53487891  | -0.59023259 |
| H | -0.30255706 | 2.16741987  | -1.96382679 |
| H | -0.94993403 | 2.30715136  | 1.47524774  |
| H | -0.33367307 | 3.21788846  | 0.10268974  |
| H | -1.98643285 | 2.59529551  | 0.08267543  |
| H | 0.15825733  | -0.31625539 | -2.47336330 |
| H | 1.87032007  | -0.65379437 | -2.59228823 |
| H | 0.75679919  | -1.96481044 | -2.22115007 |
| H | 2.87433457  | -1.20022699 | 0.75826320  |
| H | 2.53669648  | -2.31626357 | -0.55309320 |
| H | 3.29805418  | -0.76243497 | -0.88254633 |
| H | -2.74766304 | -0.09653792 | -1.37928407 |
| H | -2.62123620 | -1.66967320 | -0.58498468 |
| H | -1.48386864 | -1.22155548 | -1.84384187 |

### S1.3 2-EF monomer (GFN2-xTB)

35

2-Ethylfenchol (2-EF) monomer — GFN2-xTB optimized

|   |             |             |             |
|---|-------------|-------------|-------------|
| C | 3.17605500  | 1.17745800  | 0.12073500  |
| C | 2.19306300  | 0.36070600  | -0.70996900 |
| C | 1.06749400  | -0.24285000 | 0.14116200  |
| C | 0.04096200  | 0.77488700  | 0.74975400  |
| C | -0.55656100 | 0.05404300  | 1.99205200  |
| C | -1.49153600 | -0.99569400 | 1.36092900  |
| C | -1.29373800 | -0.75953400 | -0.15658000 |
| C | 0.12906800  | -1.26839600 | -0.57182400 |
| C | 0.45026200  | -2.71201200 | -0.17727800 |
| O | 0.26518300  | -1.22652700 | -1.99025600 |
| C | -1.16826800 | 0.79375100  | -0.22464800 |
| C | -2.40396000 | 1.56351400  | 0.30680100  |
| C | -0.91441800 | 1.40595000  | -1.61113700 |
| H | 3.99798100  | 1.52985600  | -0.51086700 |
| H | 2.69631700  | 2.05517800  | 0.56284000  |
| H | 3.60622000  | 0.57514800  | 0.92720600  |
| H | 1.81653900  | 1.00067700  | -1.50876600 |
| H | 2.74945600  | -0.45293500 | -1.19116400 |
| H | 1.57275800  | -0.74933600 | 0.97571900  |
| H | 0.45925800  | 1.75298700  | 0.99453300  |
| H | -1.11419300 | 0.74656200  | 2.63109800  |
| H | 0.20846500  | -0.41054300 | 2.62302400  |
| H | -2.53114900 | -0.81968100 | 1.65761300  |
| H | -1.25447300 | -2.01012400 | 1.68858200  |
| H | -2.09987600 | -1.16460500 | -0.77425100 |

|   |             |             |             |
|---|-------------|-------------|-------------|
| H | 0.54392800  | -2.85406800 | 0.90267800  |
| H | 1.39623700  | -3.02990100 | -0.63174300 |
| H | -0.32103400 | -3.39421500 | -0.55197200 |
| H | -0.42643600 | -1.79265400 | -2.37347700 |
| H | -2.73488300 | 1.28946600  | 1.30963000  |
| H | -2.19709300 | 2.63995800  | 0.33826000  |
| H | -3.26338200 | 1.40596900  | -0.35563600 |
| H | -0.08933100 | 0.98671700  | -2.17667900 |
| H | -0.70717900 | 2.47900700  | -1.52101000 |
| H | -1.80173400 | 1.29124300  | -2.24535900 |

#### S1.4 Isoborneol monomer (GFN2-xTB)

29

Isoborneol (IB) monomer — GFN2-xTB optimized

|   |             |             |             |
|---|-------------|-------------|-------------|
| C | -2.16930532 | -0.43946936 | -0.01117902 |
| C | -0.71980338 | -0.26457105 | 0.44193282  |
| C | 0.17199129  | -1.48107959 | 0.12290989  |
| C | 0.17449327  | -1.51497309 | -1.41160251 |
| C | 0.11755342  | -0.02288981 | -1.79157597 |
| C | 0.12950169  | 0.69629012  | -0.43023384 |
| C | 1.56424931  | 0.48539192  | 0.11802439  |
| C | 1.55802000  | -0.99787793 | 0.55656138  |
| O | 1.86098464  | 1.38026138  | 1.17092637  |
| C | -0.29084573 | 2.15020181  | -0.48860301 |
| C | -0.76382045 | 0.10245376  | 1.92563583  |
| H | -2.71131425 | 0.49599237  | 0.10604030  |
| H | -2.26344991 | -0.75762506 | -1.04237748 |
| H | -2.65103415 | -1.18683230 | 0.61628537  |
| H | -0.12582837 | -2.42248032 | 0.58321520  |
| H | 1.07421155  | -1.99914269 | -1.79155642 |
| H | -0.68100792 | -2.06702319 | -1.79900305 |
| H | -0.78994608 | 0.22257802  | -2.34167385 |
| H | 0.96379142  | 0.27899885  | -2.40887672 |
| H | 2.29215187  | 0.65303419  | -0.69014697 |
| H | 1.67924700  | -1.06929857 | 1.63754466  |
| H | 2.35671698  | -1.57180505 | 0.08564669  |
| H | 2.76028410  | 1.20947121  | 1.46794064  |
| H | -0.21081987 | 2.59869001  | 0.49698617  |
| H | 0.35782059  | 2.69835459  | -1.16871238 |
| H | -1.31553120 | 2.23622329  | -0.84161553 |
| H | -1.00924644 | -0.77736470 | 2.51756083  |
| H | -1.53413426 | 0.85088502  | 2.09614663  |
| H | 0.17507220  | 0.51360614  | 2.27380157  |

### S1.5 D-camphor monomer (GFN2-xTB)

27

D-Camphor monomer — GFN2-xTB optimized

|   |             |             |             |
|---|-------------|-------------|-------------|
| C | 1.61536101  | -1.16934309 | -0.49154749 |
| C | 0.74362788  | -0.14362116 | 0.22795840  |
| C | 0.65082390  | 1.21769846  | -0.49621346 |
| C | -0.05510519 | 0.85876703  | -1.80980544 |
| C | -1.07614935 | -0.20512676 | -1.36699884 |
| C | -0.77779110 | -0.40905444 | 0.13867334  |
| C | -1.33635004 | 0.86691429  | 0.75170541  |
| O | -2.34634447 | 0.98564510  | 1.39092618  |
| C | -0.37724468 | 1.97308284  | 0.34765786  |
| C | -1.33220897 | -1.68942365 | 0.72425649  |
| C | 1.24493211  | -0.03743226 | 1.66975466  |
| H | 2.64535527  | -0.81841993 | -0.51323021 |
| H | 1.59274440  | -2.11617940 | 0.04342113  |
| H | 1.29670084  | -1.35241339 | -1.51143885 |
| H | 1.59368267  | 1.74629689  | -0.62881572 |
| H | 0.64836820  | 0.46540025  | -2.54236642 |
| H | -0.53570600 | 1.73038536  | -2.25334585 |
| H | -0.95081264 | -1.14521779 | -1.90341081 |
| H | -2.10541816 | 0.12299029  | -1.51512118 |
| H | -0.90221288 | 2.75289625  | -0.20510520 |
| H | 0.05650770  | 2.43989232  | 1.23154524  |
| H | -2.41661046 | -1.69307872 | 0.63638043  |
| H | -1.07891788 | -1.76439922 | 1.77907317  |
| H | -0.93470528 | -2.55694993 | 0.20182459  |
| H | 0.54868759  | 0.49650214  | 2.31028746  |
| H | 1.38408572  | -1.03111574 | 2.08970974  |
| H | 2.20469882  | 0.47530626  | 1.69422637  |

### S1.6 2-EF + o-PD complex (B3LYP-D3(BJ)/def2-SVP)

51

2-EF + oPD complex, B3LYP-D3(BJ)/def2-SVP optimized, E = -888.18711976 Ha

|   |           |           |           |
|---|-----------|-----------|-----------|
| C | 2.585048  | -1.005237 | -1.006057 |
| C | 1.587613  | -0.380765 | -1.987291 |
| C | 0.123006  | -0.033368 | -1.609315 |
| C | -0.086290 | 1.136849  | -0.535218 |
| C | -0.957977 | 0.429438  | 0.551033  |
| C | -2.393786 | 0.199816  | 0.052505  |
| C | -2.198380 | -0.875816 | -1.048519 |
| C | -0.683903 | -1.227764 | -0.975658 |
| C | -0.409827 | -1.007964 | 0.527367  |
| C | -0.396146 | -2.600204 | -1.571020 |

|   |           |           |           |
|---|-----------|-----------|-----------|
| C | 1.201563  | 1.644357  | 0.134562  |
| C | -0.766801 | 2.364805  | -1.153578 |
| O | -0.476912 | 0.382449  | -2.837622 |
| H | 2.889394  | -0.325553 | -0.201016 |
| H | 3.497588  | -1.279871 | -1.559331 |
| H | 2.207087  | -1.924711 | -0.538502 |
| H | 2.027235  | 0.541563  | -2.401356 |
| H | 1.514050  | -1.063368 | -2.847479 |
| H | -0.906515 | 0.948606  | 1.519650  |
| H | -3.011791 | -0.184717 | 0.877558  |
| H | -2.878173 | 1.113371  | -0.315441 |
| H | -2.476839 | -0.516018 | -2.046281 |
| H | -2.791696 | -1.779561 | -0.836534 |
| H | 0.649525  | -1.087913 | 0.802869  |
| H | -0.986279 | -1.697251 | 1.164823  |
| H | 0.650924  | -2.911329 | -1.453731 |
| H | -0.626746 | -2.612771 | -2.649607 |
| H | -1.028195 | -3.363542 | -1.090443 |
| H | 0.960734  | 2.527146  | 0.748503  |
| H | 1.958140  | 1.954158  | -0.601921 |
| H | 1.656429  | 0.903024  | 0.804551  |
| H | -1.074036 | 3.060401  | -0.354169 |
| H | -1.643747 | 2.111099  | -1.758137 |
| H | -0.065413 | 2.900823  | -1.812903 |
| H | -0.538546 | -0.382177 | -3.452175 |
| C | 2.912017  | -2.627310 | -5.901704 |
| C | 3.667012  | -1.455596 | -5.977124 |
| C | 3.054717  | -0.215265 | -5.776322 |
| C | 1.683440  | -0.115160 | -5.500747 |
| C | 0.917067  | -1.306794 | -5.462046 |
| C | 1.538695  | -2.543363 | -5.647279 |
| N | -0.463485 | -1.197517 | -5.167689 |
| N | 1.031019  | 1.104336  | -5.296411 |
| H | 3.381687  | -3.601277 | -6.044206 |
| H | 4.738952  | -1.503066 | -6.181603 |
| H | 3.649965  | 0.700860  | -5.810431 |
| H | 0.932892  | -3.453314 | -5.604119 |
| H | -0.982236 | -2.047482 | -5.372176 |
| H | -0.880509 | -0.403543 | -5.659007 |
| H | 0.467332  | 1.115795  | -4.438610 |
| H | 1.660167  | 1.901852  | -5.312122 |

**S1.7 2-MIB + o-PD complex (B3LYP-D3(BJ)/def2-SVP)**

2-MIB + oPD complex, B3LYP-D3(BJ)/def2-SVP optimized, E = -848.90343936 Ha

|   |                 |                 |                 |
|---|-----------------|-----------------|-----------------|
| C | -2.525518757121 | 0.062044558128  | 0.298527339365  |
| C | -1.075439522278 | -0.447158783929 | 0.352968181842  |
| C | -0.558150565579 | -0.688274188095 | 1.799488388575  |
| C | -0.599144680971 | 0.726929259252  | 2.423242170010  |
| C | -0.278100970314 | 1.650718555088  | 1.214210153511  |
| C | 0.014989118462  | 0.657086398931  | 0.064156856968  |
| C | 1.364587527348  | -0.085702922272 | 0.422173431329  |
| C | 0.919805953991  | -1.043957239489 | 1.566415715094  |
| C | 2.516363694626  | 0.831969025220  | 0.842658993359  |
| O | 1.815577862425  | -0.877055682346 | -0.679220905664 |
| C | 0.010782138998  | 1.286598550668  | -1.317057059429 |
| C | -1.024392207219 | -1.686902332963 | -0.553179715854 |
| H | -2.737102817242 | 0.903814271256  | 0.969177331704  |
| H | -3.213435108780 | -0.754135906907 | 0.571836691151  |
| H | -2.787728822686 | 0.376613694157  | -0.724439138618 |
| H | -1.111791573170 | -1.446402057784 | 2.374465288438  |
| H | -1.583158385815 | 0.953942882263  | 2.858599273305  |
| H | 0.137174135415  | 0.824451592646  | 3.235897030297  |
| H | 0.554943264459  | 2.340136759885  | 1.399679124042  |
| H | -1.141286107954 | 2.277624527034  | 0.949290549402  |
| H | 1.044563109822  | -2.083353087747 | 1.235066862571  |
| H | 1.526211006864  | -0.911184198545 | 2.475100661791  |
| H | 2.315780728674  | 1.356030371603  | 1.785865032264  |
| H | 2.738084210665  | 1.585931576817  | 0.070558543001  |
| H | 3.423992797281  | 0.227350430973  | 0.982666972253  |
| H | 2.296830627916  | -0.310871078492 | -1.323840151458 |
| H | -0.945986717220 | 1.794355781468  | -1.516893624065 |
| H | 0.165676540799  | 0.530994378873  | -2.101035349549 |
| H | 0.807966016925  | 2.042656852971  | -1.413878956546 |
| H | -1.398422592392 | -1.434545905449 | -1.559164699028 |
| H | -0.019638957867 | -2.097578688366 | -0.680108301439 |
| H | -1.686803981977 | -2.470230416164 | -0.148253317246 |
| C | 7.121412645449  | 0.392972151576  | 0.075220772296  |
| C | 6.734549929015  | 1.483518231490  | -0.703900731543 |
| C | 5.630044176946  | 1.365169680071  | -1.554216155255 |
| C | 4.905607893265  | 0.174235398602  | -1.627295303082 |
| C | 5.266750177110  | -0.925065475687 | -0.807066015133 |
| C | 6.388598104411  | -0.796093214696 | 0.023140274672  |
| N | 4.513655824332  | -2.100503121416 | -0.901312227370 |
| N | 3.770618576721  | 0.032451585153  | -2.461627236638 |
| H | 7.987564713634  | 0.465798749489  | 0.736805870550  |
| H | 7.291227694096  | 2.422028137062  | -0.662082812506 |
| H | 5.330976425280  | 2.207365229486  | -2.185261548070 |

|   |                |                 |                 |
|---|----------------|-----------------|-----------------|
| H | 6.676391765834 | -1.644742639662 | 0.650494917269  |
| H | 4.828165457436 | -2.826474222462 | -0.264693968609 |
| H | 3.507362395831 | -1.935867766931 | -0.778825929917 |
| H | 3.743621591781 | -0.898722632165 | -2.883515949812 |
| H | 3.722320629799 | 0.742344926471  | -3.188387865867 |

### S1.8 Isoborneol + o-PD complex (B3LYP-D3(BJ)/def2-SVP)

45

IB + oPD complex, B3LYP-D3(BJ)/def2-SVP optimized, E = -809.60717998 Ha

|   |           |           |           |
|---|-----------|-----------|-----------|
| C | -1.956066 | -0.169638 | 0.452067  |
| C | -0.429781 | -0.130759 | 0.609802  |
| C | 0.275220  | -1.433895 | 0.130467  |
| C | -0.061480 | -1.477288 | -1.374938 |
| C | -0.046109 | 0.028397  | -1.772220 |
| C | 0.310676  | 0.761638  | -0.453010 |
| C | 1.809569  | 0.421638  | -0.211802 |
| C | 1.765374  | -1.068461 | 0.244968  |
| O | 2.404950  | 1.273094  | 0.747790  |
| C | 0.006292  | 2.247975  | -0.462934 |
| C | -0.134343 | 0.242621  | 2.070878  |
| H | -2.390957 | 0.822661  | 0.650783  |
| H | -2.297434 | -0.488479 | -0.541732 |
| H | -2.388531 | -0.867715 | 1.188489  |
| H | -0.005647 | -2.345142 | 0.681838  |
| H | 0.679662  | -2.069864 | -1.934020 |
| H | -1.042843 | -1.937593 | -1.561055 |
| H | -1.027689 | 0.361480  | -2.142204 |
| H | 0.684927  | 0.255136  | -2.564086 |
| H | 2.355161  | 0.527341  | -1.170212 |
| H | 2.123665  | -1.133776 | 1.282602  |
| H | 2.402343  | -1.723683 | -0.370283 |
| H | 3.374778  | 1.091572  | 0.759563  |
| H | 0.277736  | 2.715801  | 0.494534  |
| H | 0.573972  | 2.758383  | -1.257183 |
| H | -1.063970 | 2.429357  | -0.648847 |
| H | -0.401172 | -0.596808 | 2.736350  |
| H | -0.750343 | 1.104773  | 2.373522  |
| H | 0.911498  | 0.514658  | 2.242777  |
| C | 6.781313  | 2.085157  | 3.997202  |
| C | 6.112940  | 3.243942  | 4.393628  |
| C | 5.130540  | 3.801492  | 3.569930  |
| C | 4.797252  | 3.223200  | 2.335669  |
| C | 5.506238  | 2.065676  | 1.927008  |
| C | 6.476009  | 1.505226  | 2.760978  |

|   |          |          |           |
|---|----------|----------|-----------|
| N | 5.164740 | 1.492759 | 0.672008  |
| N | 3.851262 | 3.775495 | 1.469101  |
| H | 7.544709 | 1.635634 | 4.635725  |
| H | 6.344775 | 3.713779 | 5.351028  |
| H | 4.594259 | 4.701116 | 3.890040  |
| H | 7.007939 | 0.609171 | 2.427342  |
| H | 5.834722 | 0.788581 | 0.370039  |
| H | 5.081480 | 2.213700 | -0.044444 |
| H | 3.193464 | 3.095789 | 1.074668  |
| H | 3.346778 | 4.558602 | 1.869890  |

### S1.9 D-camphor + o-PD complex (B3LYP-D3(BJ)/def2-SVP)

43

D-Camphor + oPD complex, B3LYP-D3(BJ)/def2-SVP optimized, E = -808.40484290 Ha

|   |           |           |           |
|---|-----------|-----------|-----------|
| C | 1.605841  | -1.387035 | -1.113627 |
| C | 0.972961  | -0.179044 | -0.413659 |
| C | 0.838932  | 1.081315  | -1.325721 |
| C | -0.111627 | 0.598903  | -2.440898 |
| C | -1.111702 | -0.309008 | -1.666467 |
| C | -0.576154 | -0.311801 | -0.198236 |
| C | -0.911046 | 1.097042  | 0.284025  |
| O | -1.769447 | 1.388302  | 1.089465  |
| C | 0.030553  | 2.049545  | -0.445312 |
| C | -1.112322 | -1.407530 | 0.694188  |
| C | 1.746803  | 0.072394  | 0.888065  |
| H | 2.658937  | -1.169522 | -1.353902 |
| H | 1.594436  | -2.263371 | -0.446791 |
| H | 1.102697  | -1.673505 | -2.046667 |
| H | 1.793889  | 1.490274  | -1.683801 |
| H | 0.425800  | 0.036899  | -3.216521 |
| H | -0.607592 | 1.442144  | -2.941084 |
| H | -1.124541 | -1.338662 | -2.053044 |
| H | -2.149654 | 0.056877  | -1.711158 |
| H | -0.543303 | 2.804199  | -1.005079 |
| H | 0.614664  | 2.599811  | 0.306169  |
| H | -2.199360 | -1.294650 | 0.824076  |
| H | -0.658263 | -1.356712 | 1.694989  |
| H | -0.914003 | -2.404786 | 0.273289  |
| H | -1.286509 | 1.202836  | 4.366385  |
| H | 1.826844  | -0.856440 | 1.474508  |
| H | 2.771501  | 0.409820  | 0.665235  |
| C | 2.673180  | 1.348395  | 4.596753  |
| C | 3.273638  | 2.346247  | 3.827980  |
| C | 2.475048  | 3.220008  | 3.082121  |

|   |           |          |          |
|---|-----------|----------|----------|
| C | 1.081325  | 3.106222 | 3.086597 |
| C | 0.467178  | 2.067038 | 3.836876 |
| C | 1.280442  | 1.213117 | 4.590611 |
| N | -0.931075 | 1.991992 | 3.837561 |
| N | 0.263770  | 3.937367 | 2.315530 |
| H | 3.283690  | 0.664915 | 5.192398 |
| H | 4.360701  | 2.459673 | 3.816562 |
| H | 2.939138  | 4.014774 | 2.489667 |
| H | 0.806306  | 0.420615 | 5.176296 |
| H | 1.291268  | 0.825712 | 1.543850 |
| H | -1.338903 | 1.977522 | 2.899187 |
| H | 0.681671  | 4.826385 | 2.062330 |
| H | -0.667669 | 4.055286 | 2.705430 |

Table S4. Key parameters used in the MD simulations

| Parameters                            | Value             |
|---------------------------------------|-------------------|
| Software                              | GROMACS           |
| Force field (solute)                  | GAFF2             |
| Water model                           | TIP3P             |
| Box size                              | 40 × 40 × 40 Å    |
| Template molecules                    | 1 (2-EF or 2-MIB) |
| o-PD molecules                        | 10                |
| NH <sub>4</sub> <sup>+</sup> ions     | 4                 |
| CH <sub>3</sub> COO <sup>-</sup> ions | 4                 |
| CH <sub>3</sub> COOH molecules        | 2                 |
| Water molecules                       | ~2000             |
| Integrator                            | leap-frog         |
| Time step                             | 1 fs              |
| Thermostat                            | V-rescale         |
| $\tau$                                | 0.1 ps            |
| Tref                                  | 298.15 K          |
| Electrostatics                        | PME               |
| rcoulomb                              | 1.2 nm            |
| vdW cutoff                            | 1.2 nm            |
| Constraints                           | LINCS             |
| Energy minimization                   | steepest descent  |
| NVT equilibration                     | 100 ps            |
| NPT equilibration                     | 100 ps            |
| Production run                        | 10 ns (NVT)       |
| Analysis window                       | last 8 ns         |
